# Supplementary material for: Viral Infection Drives the Regulation of Feeding Behavior Related Genes in Salmo salar
Source: MDPI journal article supplement (doi:10.3390/ijms222111391), 2021-10-21
Supplement: s1 [file s1]

## Supplementary Material

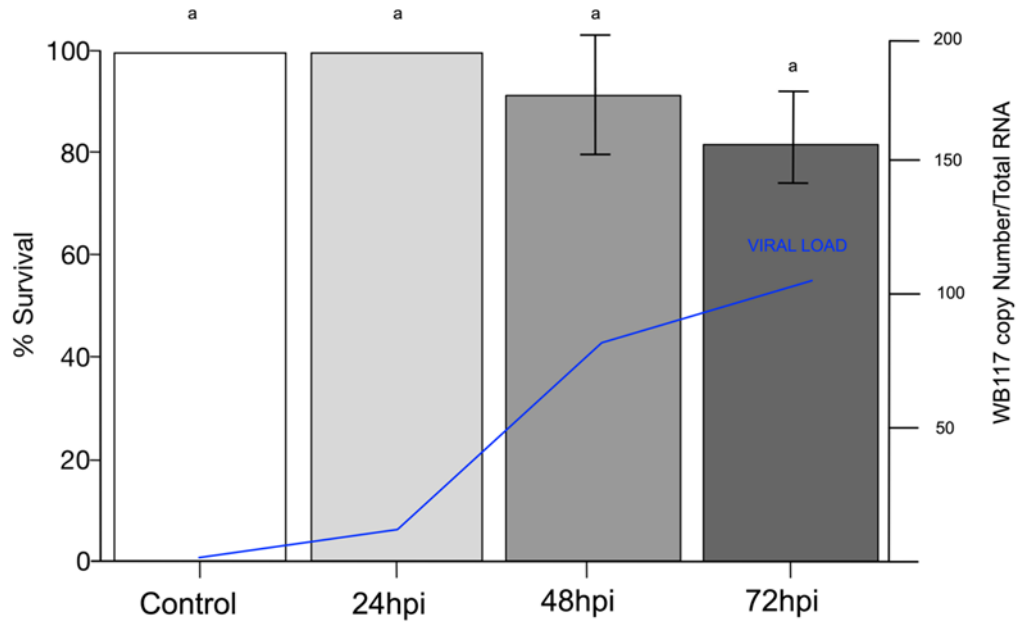

**Figure S1.** Survival rate and Viral load expressed as the abundance of WB117 segment of the IPNV virus by RT-qPCR in spleen. Bar graph showing differences in mRNA abundances between different times point and control (mean  $\pm$  s.d., Two-way ANOVA followed by Tukey's post-hoc test). Different letters denote significant differences. Mean and standard error of IPNV copy number per ng of total RNA for the VP2 IPNV viral segment.

**Table S1.** mRNA primer sequences used for absolute RT-qPCR analysis.

| Gene          | Name                                     | Sequence Primer 5'-3'                                         | Amplicon Size (bp) | E (%) | Tm (°C) | GenBank        |
|---------------|------------------------------------------|---------------------------------------------------------------|--------------------|-------|---------|----------------|
| <i>agrp1</i>  | Acyl-CoA Retinol O-Fatty-Acyltransferase | F: GCGTTCTCCCCGTCGCTGTA<br>R: TGTTAGGGGCGCCTGTGAGC            | 156                | 103   | 64      | XM_014182677.1 |
| <i>npy</i>    | Neuropeptide Y                           | F: CCCCACACACTGGATACAC<br>R: CATATCTGGACTGTGGGAGCG            | 77                 | 101   | 64      | NM_001146681.1 |
| <i>mc4r</i>   | Melanocortin 4 Receptor                  | F: CACCGACAACAACACCAGC<br>R: CAGACTAATGAGGCCAGCG              | 97                 | 99    | 62      | XM_014127040.1 |
| <i>crf</i>    | Corticotropin-Releasing Factor           | F: AACCAGCTCGACGACTCGATGG<br>R: GCTATGGGCTTGTTGCTGTAAGT       | 135                | 103   | 60      | BT057824       |
| <i>leptin</i> | Leptin                                   | F: GGTGATTAGGATCAATAAGCTGGA<br>R: GAAGAGCATTAGGTCCTGGTAGAA    | 148                | 108   | 60      | FJ830677.1     |
| <i>lepr</i>   | Leptin Receptor                          | F: GGGAAGGCTGACACTATGGA<br>R: CTTGTCTGGGACTGACGTAGG           | 128                | 98    | 60      | AB489201       |
| <i>pomcb1</i> | Proopiomelanocortin b1                   | F: CTTCCGCTGGGGCAAACC<br>R: CTCCCGCCATCTTGTCCT                | 146                | 101   | 60      | NM_001128604.1 |
| <i>cart</i>   | CART Prepropeptide                       | F: AGTGTGATTGCCAGAAGCAGATG<br>R: CATGTTGTCTTGCTGCCCCGCC       | 117                | 106   | 62      | XM_014141510.1 |
| <i>igf1</i>   | Insulin Like Growth Factor 1             | F: CCTGTTCGCTAAATCTCACTTC<br>R: TACAGCACATCGCACTCTTGA         | 226                | 97    | 60      | EF432852       |
| <i>igf1-r</i> | Insulin Like Growth Factor 1 Receptor    | F: GGGGCTCTCCTTCTGTCTTA<br>R: AGAGATAGACGACGCCTCCTA           | 176                | 111   | 60      | EU861008       |
| <i>elovl2</i> | ELOVL Fatty Acid Elongase 2              | F: CGGGTACAAAATGTGCTGGT<br>R: TCTGTTTGCCGATAGCCATT            | 145                | 108   | 64      | TC91192        |
| <i>elovl5</i> | ELOVL Fatty Acid Elongase 5              | F: ACAAGACAGGAATCTCTTTCAGATTAA<br>R: TCTGGGTTACTGTGCTATAGTGAC | 137                | 98    | 62      | AY170327       |
| <i>d5fad</i>  | delta-5 fatty acyl desaturase            | F: GTGAATGGGGATCCATAGCA<br>R: AAACGAACGGACAACCAGA             | 192                | 101   | 60      | AF478472       |
| <i>d6fad</i>  | delta-6 fatty acyl desaturase            | F: GTGAATGGGGATCCATAGCA<br>R: AAACGAACGGACAACCAGA             | 192                | 105   | 58      | GU294488       |
| <i>Tnfa</i>   | Tumor Necrosis Factor-Alpha              | F: AGGTTGGCTATGGAGGCTGT<br>R: TCTGCTTCAATGTATGGTGGG           | 250                | 108   | 62      | NM_001123589.1 |
| <i>Il1b</i>   | Interleukin 1 Beta                       | F: CGTCACATTGCCAACCTCAT<br>R: ACTGTGATGTACTGCTGAAC            | 200                | 98    | 62      | AY617117       |
| <i>il-6</i>   | Interleukin 6                            | F: CAGCGGAGAGGTAGTCTGGA<br>R: CGTCCAGAAAGCAGTGGACT            | 139                | 107   | 60      | DQ866150       |
| <i>cox-2</i>  | Cytochrome C Oxidase II                  | F: CAGTGCTCCCAGATGCCAAG<br>R: GCGAAGAAGGCCAACATGAG            | 99                 | 94    | 60      | AY848944.1     |
